# Supplementary material for: Lysogenization of Staphylococcus aureus RN450 by phages ϕ11 and ϕ80α leads to the activation of the SigB regulon
Source: PubMed Central journal article supplement (PMC6107660; doi:10.1038/s41598-018-31107-z), 2018-08-23
Supplement: 41598_2018_31107_MOESM1_ESM.pdf [file 41598_2018_31107_MOESM1_ESM.pdf]

1 **Lysogenization of *Staphylococcus aureus* RN450 by phages  $\phi$ 11 and  $\phi$ 80 $\alpha$  leads to**  
2 **the activation of the SigB regulon**

3

4 Running Title: Transcriptome of *Staphylococcus aureus* lysogens

5

6 Lucía Fernández<sup>1#</sup>, Silvia González<sup>1</sup>, Nuria Quiles-Puchalt<sup>2</sup>, Diana Gutiérrez<sup>1</sup>, José R.

7 Penadés<sup>2</sup>, Pilar García<sup>1</sup>, Ana Rodríguez<sup>1</sup>

8

9 <sup>1</sup>Instituto de Productos Lácteos de Asturias (IPLA-CSIC). Paseo Río Linares s/n 33300  
10 - Villaviciosa, Asturias, Spain.

11 <sup>2</sup> Institute of Infection, Immunity and Inflammation, College of Medical, Veterinary and  
12 Life Sciences, University of Glasgow, G12 8TA Glasgow, UK.

13

14

15 <sup>#</sup>Address correspondence to Dr. Lucía Fernández, [lucia.fernandez@ipla.csic.es](mailto:lucia.fernandez@ipla.csic.es)

16

17 L.F. and S.G. contributed equally to this work

18

**Figure S1. Analysis of phage release throughout biofilm development in lysogenic strains RN450- $\phi$ 11 and RN450- $\phi$ 80 $\alpha$ .** Biofilms were formed for 3, 5, 8 or 24 hours by strains RN450-f80a (A) or RN450-f11 (B). Then, free phage particles in the adhered phase (biofilm) were titrated using strain *S. aureus* RN4220 as a host.

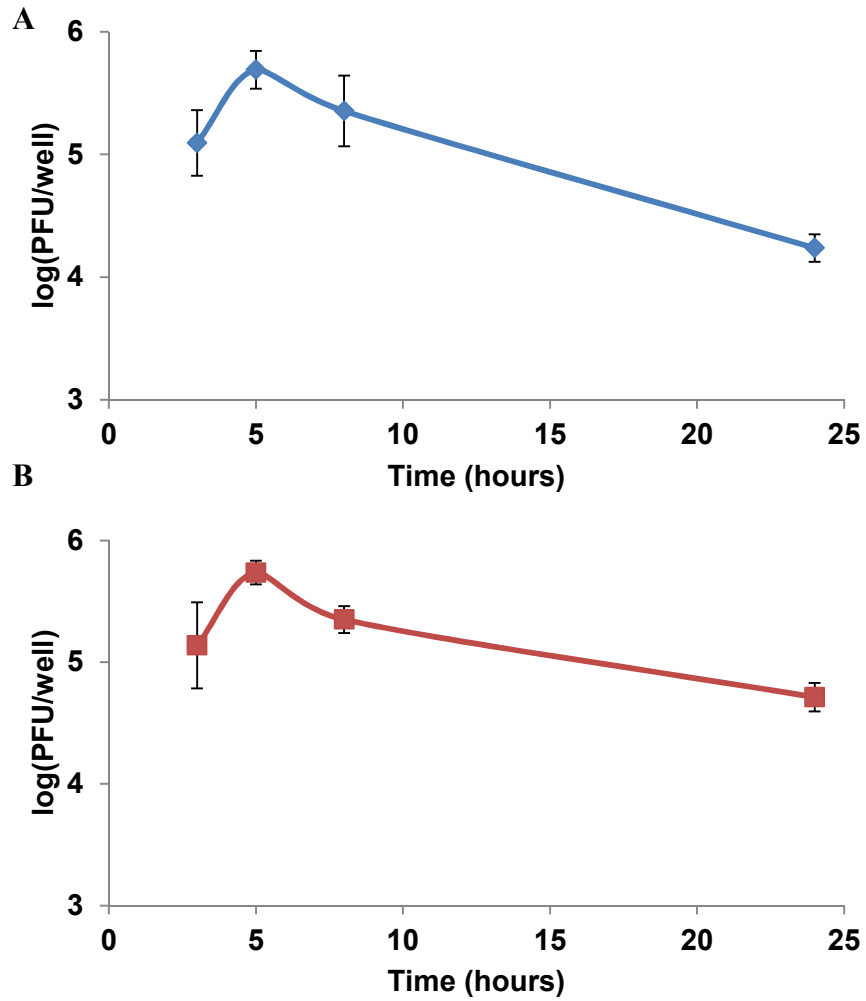

**Table S1. Full list of genes dysregulated in biofilms formed by the lysogenic strain RN450-Φ11 compared to the non-lysogenic strain RN4**

| Gene ID*      | Gene name     | Gene product                                                  | Fold-change | padj     |
|---------------|---------------|---------------------------------------------------------------|-------------|----------|
| SAOUHSC_02163 |               |                                                               | -5.22       | 9.41E-10 |
| SAOUHSC_02906 | SAOUHSC_02906 | Putative uncharacterized protein                              | -3.24       | 5.66E-08 |
| SAOUHSC_02240 |               |                                                               | -3.21       | 8.61E-06 |
| SAOUHSC_02967 | SAOUHSC_02967 | "Arginine/ornithine antiporter, putative"                     | -3.06       | 7.63E-09 |
| SAOUHSC_00401 | SAOUHSC_00401 | Putative uncharacterized protein                              | -2.99       | 4.41E-04 |
| SAOUHSC_02969 | arcA          | Arginine deiminase                                            | -2.98       | 6.10E-07 |
| SAOUHSC_02965 | arcC2         | Carbamate kinase 2                                            | -2.94       | 9.53E-12 |
| SAOUHSC_02907 | SAOUHSC_02907 | Putative uncharacterized protein                              | -2.89       | 1.29E-05 |
| SAOUHSC_02905 | SAOUHSC_02905 | Putative uncharacterized protein                              | -2.83       | 5.78E-08 |
| SAOUHSC_01942 | splA          | Serine protease SplA                                          | -2.75       | 4.30E-04 |
| SAOUHSC_02968 | argF          | Ornithine carbamoyltransferase                                | -2.66       | 2.81E-06 |
| SAOUHSC_02452 | lacD          | "Tagatose 1,6-diphosphate aldolase"                           | -2.60       | 1.07E-05 |
| SAOUHSC_02453 | lacC          | Tagatose-6-phosphate kinase                                   | -2.56       | 2.50E-06 |
| SAOUHSC_01941 | splB          | Serine protease SplB                                          | -2.51       | 1.33E-02 |
| SAOUHSC_02454 | lacB          | Galactose-6-phosphate isomerase subunit LacB                  | -2.49       | 4.14E-03 |
| SAOUHSC_01135 | SAOUHSC_01135 | Putative uncharacterized protein                              | -2.49       | 1.91E-03 |
| SAOUHSC_02260 | hld           | Delta-hemolysin                                               | -2.48       | 1.54E-04 |
| SAOUHSC_02090 | SAOUHSC_02090 | Conserved hypothetical phage protein                          | -2.45       | 1.21E-15 |
| SAOUHSC_02964 | arcR          | HTH-type transcriptional regulator ArcR                       | -2.41       | 8.50E-06 |
| SAOUHSC_01136 | SAOUHSC_01136 | Putative uncharacterized protein                              | -2.27       | 2.43E-03 |
| SAOUHSC_02451 | SAOUHSC_02451 | "PTS system lactose-specific IIA component, putative"         | -2.26       | 1.21E-02 |
| SAOUHSC_02266 | SAOUHSC_02266 | Putative uncharacterized protein                              | -2.25       | 4.99E-06 |
| SAOUHSC_02620 | SAOUHSC_02620 | Putative uncharacterized protein                              | -2.24       | 6.23E-06 |
| SAOUHSC_02971 | SAOUHSC_02971 | "Aureolysin, putative"                                        | -2.21       | 4.19E-11 |
| SAOUHSC_01950 | SAOUHSC_01950 | "Flavoprotein, epiD, putative"                                | -2.20       | 1.19E-04 |
| SAOUHSC_01945 | SAOUHSC_01945 | "Membrane protein, putative"                                  | -2.17       | 7.81E-06 |
| SAOUHSC_01935 | splF          | Serine protease SplF                                          | -2.15       | 9.18E-04 |
| SAOUHSC_01939 | splC          | Serine protease SplC                                          | -2.14       | 1.53E-03 |
| SAOUHSC_01949 | SAOUHSC_01949 | "Intracellular serine protease, putative"                     | -2.10       | 2.50E-05 |
| SAOUHSC_00257 | SAOUHSC_00257 | Putative uncharacterized protein                              | -2.09       | 1.13E-05 |
| SAOUHSC_01952 | SAOUHSC_01952 | "Lantibiotic epidermin biosynthesis protein EpiB, putative"   | -2.07       | 2.41E-04 |
| SAOUHSC_01951 | SAOUHSC_01951 | "Epidermin biosynthesis protein EpiC, authentic point mutatio | -2.07       | 1.21E-04 |
| SAOUHSC_02970 |               |                                                               | -2.06       | 5.66E-04 |
| SAOUHSC_01513 | SAOUHSC_01513 | Putative uncharacterized protein                              | -2.03       | 1.42E-05 |
| SAOUHSC_00988 | sspA          | Glutamyl endopeptidase                                        | -2.03       | 1.95E-04 |
| SAOUHSC_02455 | lacA          | Galactose-6-phosphate isomerase subunit LacA                  | -2.01       | 1.42E-02 |
| SAOUHSC_02261 | agrB          | Accessory gene regulator protein B                            | -2.00       | 1.08E-04 |
| SAOUHSC_02265 | SAOUHSC_02265 | Accessory gene regulator protein A                            | -2.00       | 8.54E-06 |
| SAOUHSC_01018 | purD          | Phosphoribosylamine--glycine ligase                           | 2.00        | 1.69E-03 |
| SAOUHSC_01918 | SAOUHSC_01918 | Putative uncharacterized protein                              | 2.01        | 1.13E-02 |
| SAOUHSC_00632 | mnhG2         | Putative antiporter subunit mnhG2                             | 2.04        | 5.53E-05 |
| SAOUHSC_00630 | SAOUHSC_00630 | Putative uncharacterized protein                              | 2.05        | 6.38E-06 |
| SAOUHSC_02848 | glcB          | PTS system glucoside-specific EIICBA component                | 2.07        | 1.21E-04 |
| SAOUHSC_00655 | SAOUHSC_00655 | Putative uncharacterized protein                              | 2.07        | 4.88E-02 |
| SAOUHSC_00629 | mnhE2         | Putative antiporter subunit mnhE2                             | 2.08        | 1.37E-05 |
| SAOUHSC_03032 | SAOUHSC_03032 | Putative uncharacterized protein                              | 2.09        | 4.16E-03 |
| SAOUHSC_00625 | mnhA2         | Putative antiporter subunit mnhA2                             | 2.10        | 2.46E-08 |
| SAOUHSC_02597 | SAOUHSC_02597 | "PTS system component, putative"                              | 2.12        | 1.07E-02 |
| SAOUHSC_00627 | mnhC2         | Putative antiporter subunit mnhC2                             | 2.13        | 2.68E-04 |
| SAOUHSC_00626 | mnhB2         | Putative antiporter subunit mnhB2                             | 2.14        | 7.06E-05 |
| SAOUHSC_00628 | mnhD2         | Putative antiporter subunit mnhD2                             | 2.14        | 5.08E-08 |
| SAOUHSC_02877 | crtN          | Dehydrosqualene desaturase                                    | 2.14        | 2.28E-11 |
| SAOUHSC_02137 | sdcS          | Sodium-dependent dicarboxylate transporter SdcS               | 2.15        | 7.79E-06 |
| SAOUHSC_01017 | purH          | Bifunctional purine biosynthesis protein PurH                 | 2.17        | 2.39E-02 |
| SAOUHSC_01318 | SAOUHSC_01318 | Putative uncharacterized protein                              | 2.18        | 1.61E-03 |
| SAOUHSC_02729 | SAOUHSC_02729 | "Amino acid ABC transporter-like protein, putative"           | 2.20        | 2.19E-02 |
| SAOUHSC_01603 | SAOUHSC_01603 | Putative uncharacterized protein                              | 2.21        | 2.71E-02 |
| SAOUHSC_01921 | SAOUHSC_01921 | Putative uncharacterized protein                              | 2.21        | 1.54E-03 |
| SAOUHSC_02822 | fbp           | "Fructose-1,6-bisphosphatase class 3"                         | 2.31        | 4.20E-02 |
| SAOUHSC_00160 | SAOUHSC_00160 | Putative uncharacterized protein                              | 2.31        | 3.00E-02 |

|                |                 |                                                              |      |          |
|----------------|-----------------|--------------------------------------------------------------|------|----------|
| SAOUHSC_00291  | SAOUHSC_00291   | "PfkB family carbohydrate kinase family, putative"           | 2.32 | 2.99E-02 |
| SAOUHSC_02772  | SAOUHSC_02772   | Putative uncharacterized protein                             | 2.32 | 6.38E-06 |
| SAOUHSC_03028  | SAOUHSC_03028   | Putative uncharacterized protein                             | 2.34 | 1.12E-04 |
| SAOUHSC_01920  | SAOUHSC_01920   | Putative uncharacterized protein                             | 2.35 | 1.72E-04 |
| SAOUHSC_00061  | SAOUHSC_00061   | Putative uncharacterized protein                             | 2.35 | 8.91E-11 |
| SAOUHSC_02425  | SAOUHSC_02425   | UPF0457 protein SAOUHSC_02425                                | 2.39 | 1.50E-02 |
| SAOUHSC_00156  | SAOUHSC_00156   | Putative uncharacterized protein                             | 2.47 | 5.99E-03 |
| SAOUHSC_02908  | SAOUHSC_02908   | Putative uncharacterized protein                             | 2.49 | 3.11E-13 |
| SAOUHSC_02815  | SAOUHSC_02815   | Putative uncharacterized protein                             | 2.63 | 1.37E-03 |
| SAOUHSC_01602  | SAOUHSC_01602   | "Transcriptional regulator, putative"                        | 2.67 | 2.41E-03 |
| SAOUHSC_01601  | SAOUHSC_01601   | "Alpha-glucosidase, putative"                                | 2.70 | 2.45E-03 |
| SAOUHSC_00624  | SAOUHSC_00624   | "Integrase/recombinase, putative"                            | 2.72 | 4.42E-10 |
| SAOUHSC_00317  | SAOUHSC_00317   | Glycerol-3-phosphate transporter                             | 2.81 | 2.54E-05 |
| SAOUHSC_00196  | SAOUHSC_00196   | Putative uncharacterized protein                             | 2.82 | 3.92E-02 |
| SAOUHSC_02882  | crtO            | "Glycosyl-4,4'-diaponeurosporenoate acyltransferase"         | 2.93 | 3.13E-03 |
| SAOUHSC_02771  | SAOUHSC_02771   | Putative uncharacterized protein                             | 2.96 | 2.96E-06 |
| SAOUHSC_00846  | SAOUHSC_00846   | Putative uncharacterized protein                             | 2.97 | 4.87E-17 |
| SAOUHSC_02812  | SAOUHSC_02812   | Putative uncharacterized protein                             | 3.00 | 1.36E-16 |
| SAOUHSC_02881  | crtP            | Diapolycopene oxygenase                                      | 3.08 | 1.46E-03 |
| SAOUHSC_00157  | murQ            | N-acetylmuramic acid 6-phosphate etherase                    | 3.13 | 2.71E-03 |
| SAOUHSC_01910  | pckA            | Phosphoenolpyruvate carboxykinase [ATP]                      | 3.14 | 2.47E-03 |
| SAOUHSC_00070  | sarS            | HTH-type transcriptional regulator SarS                      | 3.26 | 5.67E-06 |
| SAOUHSC_02403  | mtlD            | Mannitol-1-phosphate 5-dehydrogenase                         | 3.27 | 2.51E-06 |
| SAOUHSC_02387  | SAOUHSC_02387   | Putative uncharacterized protein                             | 3.30 | 1.70E-22 |
| SAOUHSC_02400  | SAOUHSC_02400   | "PTS system, mannitol-specific component, putative"          | 3.31 | 6.11E-04 |
| SAOUHSC_00158  | SAOUHSC_00158   | PTS system EIIBC component SAOUHSC_00158                     | 3.39 | 1.23E-03 |
| SAOUHSC_02879  | crtM            | Dehydrosqualene synthase                                     | 3.46 | 7.53E-23 |
| SAOUHSC_00831  | SAOUHSC_00831   | Organic hydroperoxide resistance protein-like                | 3.48 | 4.53E-14 |
| SAOUHSC_02401  | SAOUHSC_02401   | Putative uncharacterized protein                             | 3.63 | 2.55E-04 |
| SAOUHSC_00069  | spa             | Immunoglobulin G-binding protein A                           | 3.70 | 3.06E-06 |
| SAOUHSC_00183  | SAOUHSC_00183   | "Membrane protein, putative"                                 | 3.72 | 4.68E-05 |
| SAOUHSC_01794  | SAOUHSC_01794   | "Glyceraldehyde-3-phosphate dehydrogenase, type I"           | 3.77 | 2.50E-06 |
| SAOUHSC_02880  | crtQ            | "4,4'-diaponeurosporenoate glycosyltransferase"              | 3.88 | 2.54E-12 |
| SAOUHSC_00356  | SAOUHSC_00356   | Putative uncharacterized protein                             | 3.96 | 1.13E-25 |
| SAOUHSC_02402  | SAOUHSC_02402   | "PTS system, mannitol-specific IIa component, putative"      | 4.08 | 7.79E-06 |
| SAOUHSC_00358  | SAOUHSC_00358   | Putative uncharacterized protein                             | 4.67 | 3.86E-41 |
| SAOUHSC_02444  | SAOUHSC_02444   | "Osmoprotectant transporter, BCCT family, opuD-like protein, | 4.99 | 1.19E-39 |
| SAOUHSC_A00354 | SAOUHSC_00358.1 | Putative uncharacterized protein                             | 5.17 | 3.74E-17 |
| SAOUHSC_02862  | clpL            | ATP-dependent Clp protease ATP-binding subunit ClpL          | 5.24 | 1.68E-66 |
| SAOUHSC_00619  | SAOUHSC_00619   | Putative uncharacterized protein                             | 5.66 | 1.56E-60 |
| SAOUHSC_01730  | SAOUHSC_01730   | UPF0337 protein SAOUHSC_01730                                | 6.31 | 4.25E-33 |
| SAOUHSC_01729  | SAOUHSC_01729   | Putative uncharacterized protein                             | 7.55 | 3.12E-31 |
| SAOUHSC_02442  | SAOUHSC_02442   | Putative uncharacterized protein                             | 7.60 | 4.64E-86 |
| SAOUHSC_02443  | SAOUHSC_02443   | Putative uncharacterized protein                             | 8.17 | 7.15E-89 |
| SAOUHSC_00845  | SAOUHSC_00845   | UPF0337 protein SAOUHSC_00845                                | 8.90 | 8.31E-61 |
| SAOUHSC_02441  | asp23           | Alkaline shock protein 23                                    | 9.56 | 2.20E-91 |

\* Genes highlighted in grey correspond to genes dysregulated in this lysogen but not in the phi80alpha lysogenic strain

**Table S2. Full list of genes dysregulated in biofilms formed by the lysogenic strain RN450-Φ80α compared to the non-lysogenic strain RN**

| Gene ID*      | Gene name     | Gene product                                                  | Fold-change | padj      |
|---------------|---------------|---------------------------------------------------------------|-------------|-----------|
| SAOUHSC_02260 | hld           | Delta-hemolysin                                               | -25.60      | 2.36E-92  |
| SAOUHSC_01135 | SAOUHSC_01135 | Putative uncharacterized protein                              | -17.63      | 4.45E-106 |
| SAOUHSC_01136 | SAOUHSC_01136 | Putative uncharacterized protein                              | -16.54      | 1.11E-100 |
| SAOUHSC_02163 |               |                                                               | -11.84      | 5.09E-20  |
| SAOUHSC_02240 |               |                                                               | -9.04       | 3.86E-18  |
| SAOUHSC_02907 | SAOUHSC_02907 | Putative uncharacterized protein                              | -7.37       | 7.77E-32  |
| SAOUHSC_02906 | SAOUHSC_02906 | Putative uncharacterized protein                              | -7.29       | 2.90E-26  |
| SAOUHSC_02905 | SAOUHSC_02905 | Putative uncharacterized protein                              | -6.71       | 3.86E-32  |
| SAOUHSC_00401 | SAOUHSC_00401 | Putative uncharacterized protein                              | -6.40       | 2.49E-10  |
| SAOUHSC_02262 | SAOUHSC_02262 | Putative uncharacterized protein                              | -6.04       | 9.89E-47  |
| SAOUHSC_02261 | agrB          | Accessory gene regulator protein B                            | -5.98       | 9.95E-55  |
| SAOUHSC_02264 | SAOUHSC_02264 | Accessory gene regulator protein C                            | -5.60       | 2.13E-53  |
| SAOUHSC_02970 |               |                                                               | -5.20       | 2.91E-18  |
| SAOUHSC_02265 | SAOUHSC_02265 | Accessory gene regulator protein A                            | -5.03       | 5.09E-71  |
| SAOUHSC_02969 | arcA          | Arginine deiminase                                            | -4.59       | 4.43E-21  |
| SAOUHSC_02967 | SAOUHSC_02967 | "Arginine/ornithine antiporter, putative"                     | -4.55       | 1.80E-36  |
| SAOUHSC_02968 | argF          | Ornithine carbamoyltransferase                                | -4.51       | 1.91E-25  |
| SAOUHSC_02965 | arcC2         | Carbamate kinase 2                                            | -4.25       | 3.20E-25  |
| SAOUHSC_02964 | arcR          | HTH-type transcriptional regulator ArcR                       | -4.19       | 3.74E-35  |
| SAOUHSC_01953 | SAOUHSC_01953 | "Gallidermin superfamily epiA, putative"                      | -4.17       | 4.26E-23  |
| SAOUHSC_02266 | SAOUHSC_02266 | Putative uncharacterized protein                              | -4.17       | 1.82E-40  |
| SAOUHSC_02620 | SAOUHSC_02620 | Putative uncharacterized protein                              | -4.09       | 3.78E-31  |
| SAOUHSC_01584 | SAOUHSC_01584 | Putative uncharacterized protein                              | -4.03       | 9.78E-44  |
| SAOUHSC_01942 | splA          | Serine protease SplA                                          | -3.91       | 1.68E-07  |
| SAOUHSC_01583 | SAOUHSC_01583 | Conserved hypothetical phage protein                          | -3.89       | 8.70E-36  |
| SAOUHSC_01513 | SAOUHSC_01513 | Putative uncharacterized protein                              | -3.80       | 5.79E-21  |
| SAOUHSC_01512 | SAOUHSC_01512 | Putative uncharacterized protein                              | -3.77       | 3.14E-26  |
| SAOUHSC_00256 | SAOUHSC_00256 | Putative uncharacterized protein                              | -3.74       | 7.77E-32  |
| SAOUHSC_02462 | SAOUHSC_02462 | Putative uncharacterized protein                              | -3.69       | 3.21E-02  |
| SAOUHSC_00257 | SAOUHSC_00257 | Putative uncharacterized protein                              | -3.59       | 1.73E-15  |
| SAOUHSC_01511 | SAOUHSC_01511 | Putative uncharacterized protein                              | -3.43       | 5.25E-19  |
| SAOUHSC_02241 | SAOUHSC_02241 | Uncharacterized leukocidin-like protein 1                     | -3.40       | 1.27E-25  |
| SAOUHSC_02971 | SAOUHSC_02971 | "Aureolysin, putative"                                        | -3.37       | 1.69E-32  |
| SAOUHSC_01510 | SAOUHSC_01510 | Putative uncharacterized protein                              | -3.37       | 2.94E-29  |
| SAOUHSC_00272 | SAOUHSC_00272 | Putative uncharacterized protein                              | -3.36       | 2.99E-09  |
| SAOUHSC_01952 | SAOUHSC_01952 | "Lantibiotic epidermin biosynthesis protein EpiB, putative"   | -3.31       | 2.37E-24  |
| SAOUHSC_01951 | SAOUHSC_01951 | "Epidermin biosynthesis protein EpiC, authentic point mutatio | -3.24       | 6.66E-23  |
| SAOUHSC_01508 | SAOUHSC_01508 | Putative uncharacterized protein                              | -3.24       | 1.09E-25  |
| SAOUHSC_02243 | SAOUHSC_02243 | Uncharacterized leukocidin-like protein 2                     | -3.20       | 1.11E-28  |
| SAOUHSC_01950 | SAOUHSC_01950 | "Flavoprotein, epiD, putative"                                | -3.15       | 1.70E-25  |
| SAOUHSC_00988 | sspA          | Glutamyl endopeptidase                                        | -3.11       | 8.34E-10  |
| SAOUHSC_01941 | splB          | Serine protease SplB                                          | -3.10       | 6.38E-05  |
| SAOUHSC_00274 | SAOUHSC_00274 | Putative uncharacterized protein                              | -3.05       | 5.24E-13  |
| SAOUHSC_00259 | SAOUHSC_00259 | Putative uncharacterized protein                              | -3.03       | 6.68E-12  |
| SAOUHSC_00258 | SAOUHSC_00258 | Putative uncharacterized protein                              | -3.03       | 7.93E-16  |
| SAOUHSC_00260 | SAOUHSC_00260 | Putative uncharacterized protein                              | -2.94       | 1.47E-12  |
| SAOUHSC_00267 | SAOUHSC_00267 | Putative uncharacterized protein                              | -2.87       | 1.64E-19  |
| SAOUHSC_00266 | SAOUHSC_00266 | Putative uncharacterized protein                              | -2.85       | 2.64E-22  |
| SAOUHSC_02709 | hlgC          | Gamma-hemolysin component C                                   | -2.85       | 1.58E-09  |
| SAOUHSC_01949 | SAOUHSC_01949 | "Intracellular serine protease, putative"                     | -2.78       | 2.01E-15  |
| SAOUHSC_00262 | SAOUHSC_00262 | Putative uncharacterized protein                              | -2.75       | 3.54E-09  |

|                |                 |                                                               |       |          |
|----------------|-----------------|---------------------------------------------------------------|-------|----------|
| SAOUHSC_00261  | SAOUHSC_00261   | Putative uncharacterized protein                              | -2.75 | 5.72E-11 |
| SAOUHSC_02161  | SAOUHSC_02161   | MHC class II analog protein                                   | -2.72 | 5.19E-03 |
| SAOUHSC_00264  | SAOUHSC_00264   | Putative uncharacterized protein                              | -2.72 | 1.81E-08 |
| SAOUHSC_02706  | sbi             | Immunoglobulin-binding protein sbi                            | -2.69 | 1.12E-03 |
| SAOUHSC_01944  | SAOUHSC_01944   | Putative uncharacterized protein                              | -2.65 | 2.97E-04 |
| SAOUHSC_00961  | SAOUHSC_00961   | Putative uncharacterized protein                              | -2.63 | 8.10E-08 |
| SAOUHSC_00265  | SAOUHSC_00265   | Putative uncharacterized protein                              | -2.60 | 1.72E-09 |
| SAOUHSC_00717  | SAOUHSC_00717   | Putative uncharacterized protein                              | -2.59 | 8.28E-03 |
| SAOUHSC_00275  | SAOUHSC_00275   | Putative uncharacterized protein                              | -2.57 | 5.72E-09 |
| SAOUHSC_00280  | SAOUHSC_00280   | Putative uncharacterized protein                              | -2.55 | 2.68E-14 |
| SAOUHSC_T0003  |                 |                                                               | -2.53 | 3.24E-03 |
| SAOUHSC_00055  | SAOUHSC_00055   | Uncharacterized lipoprotein SAOUHSC_00055                     | -2.50 | 1.88E-16 |
| SAOUHSC_A01912 | SAOUHSC_01993.3 | Putative uncharacterized protein                              | -2.46 | 8.49E-03 |
| SAOUHSC_01945  | SAOUHSC_01945   | "Membrane protein, putative"                                  | -2.46 | 1.27E-13 |
| SAOUHSC_00561  | SAOUHSC_00561   | Putative uncharacterized protein                              | -2.46 | 1.88E-16 |
| SAOUHSC_00054  | SAOUHSC_00054   | Uncharacterized lipoprotein SAOUHSC_00054                     | -2.45 | 3.30E-12 |
| SAOUHSC_00053  | SAOUHSC_00053   | Uncharacterized lipoprotein SAOUHSC_00053                     | -2.43 | 1.11E-16 |
| SAOUHSC_02707  | SAOUHSC_02707   | Putative uncharacterized protein                              | -2.40 | 3.17E-02 |
| SAOUHSC_01121  | hly             | Alpha-hemolysin                                               | -2.38 | 3.50E-05 |
| SAOUHSC_02795  | SAOUHSC_02795   | Putative uncharacterized protein                              | -2.38 | 5.58E-10 |
| SAOUHSC_02710  | hlgB            | Gamma-hemolysin component B                                   | -2.37 | 4.00E-13 |
| SAOUHSC_01948  | SAOUHSC_01948   | ABC transporter domain protein                                | -2.36 | 6.55E-17 |
| SAOUHSC_02872  | SAOUHSC_02872   | Putative uncharacterized protein                              | -2.36 | 3.93E-04 |
| SAOUHSC_02108  | ftnA            | Ferritin                                                      | -2.34 | 1.30E-02 |
| SAOUHSC_01947  | SAOUHSC_01947   | "Membrane protein, putative"                                  | -2.33 | 3.30E-18 |
| SAOUHSC_00986  | sspC            | Staphostatin B                                                | -2.29 | 8.68E-05 |
| SAOUHSC_T00029 |                 |                                                               | -2.29 | 5.69E-03 |
| SAOUHSC_00279  | SAOUHSC_00279   | Putative uncharacterized protein                              | -2.27 | 2.33E-12 |
| SAOUHSC_00987  | sspB            | Staphopain B                                                  | -2.26 | 5.87E-04 |
| SAOUHSC_02312  | kdpA            | Potassium-transporting ATPase A chain                         | -2.25 | 1.06E-04 |
| SAOUHSC_02452  | lacD            | "Tagatose 1,6-diphosphate aldolase"                           | -2.23 | 4.99E-04 |
| SAOUHSC_00052  | SAOUHSC_00052   | Uncharacterized lipoprotein SAOUHSC_00052                     | -2.23 | 2.36E-12 |
| SAOUHSC_02109  | SAOUHSC_02109   | Putative uncharacterized protein                              | -2.22 | 2.34E-02 |
| SAOUHSC_01936  | spIE            | Serine protease SpIE                                          | -2.21 | 2.89E-05 |
| SAOUHSC_02692  | SAOUHSC_02692   | Putative uncharacterized protein                              | -2.21 | 6.50E-04 |
| SAOUHSC_00807  | SAOUHSC_00807   | Putative uncharacterized protein                              | -2.21 | 2.93E-12 |
| SAOUHSC_00975  | SAOUHSC_00975   | Putative uncharacterized protein                              | -2.20 | 3.16E-07 |
| SAOUHSC_00047  | SAOUHSC_00047   | Putative uncharacterized protein                              | -2.19 | 2.06E-10 |
| SAOUHSC_00818  | SAOUHSC_00818   | Thermonuclease                                                | -2.17 | 4.60E-07 |
| SAOUHSC_00277  | SAOUHSC_00277   | Putative uncharacterized protein                              | -2.16 | 4.87E-11 |
| SAOUHSC_00918  | SAOUHSC_00918   | Truncated MHC class II analog protein                         | -2.14 | 3.54E-10 |
| SAOUHSC_00276  | SAOUHSC_00276   | Putative uncharacterized protein                              | -2.14 | 1.16E-06 |
| SAOUHSC_03003  | icaD            | "Poly-beta-1,6-N-acetyl-D-glucosamine synthesis protein IcaD" | -2.14 | 1.69E-03 |
| SAOUHSC_02794  | SAOUHSC_02794   | Putative uncharacterized protein                              | -2.13 | 3.17E-07 |
| SAOUHSC_00808  | SAOUHSC_00808   | Putative uncharacterized protein                              | -2.13 | 2.62E-12 |
| SAOUHSC_01939  | spIC            | Serine protease SpIC                                          | -2.12 | 3.12E-05 |
| SAOUHSC_01935  | spIF            | Serine protease SpIF                                          | -2.11 | 9.33E-05 |
| SAOUHSC_02160  | SAOUHSC_02160   | Putative uncharacterized protein                              | -2.10 | 3.73E-02 |
| SAOUHSC_02865  | SAOUHSC_02865   | Putative uncharacterized protein                              | -2.09 | 2.53E-09 |
| SAOUHSC_01180  | SAOUHSC_01180   | Putative uncharacterized protein                              | -2.09 | 9.16E-12 |
| SAOUHSC_02691  | SAOUHSC_02691   | Putative uncharacterized protein                              | -2.07 | 3.38E-03 |
| SAOUHSC_00268  | SAOUHSC_00268   | Putative uncharacterized protein                              | -2.06 | 7.68E-12 |

|               |               |                                                              |       |          |
|---------------|---------------|--------------------------------------------------------------|-------|----------|
| SAOUHSC_02451 | SAOUHSC_02451 | "PTS system lactose-specific IIA component, putative"        | -2.06 | 1.05E-02 |
| SAOUHSC_03004 | icaB          | "Poly-beta-1,6-N-acetyl-D-glucosamine N-deacetylase"         | -2.05 | 7.71E-05 |
| SAOUHSC_02999 | SAOUHSC_02999 | Capsular polysaccharide biosynthesis protein Cap5B           | -2.04 | 1.66E-05 |
| SAOUHSC_00806 | SAOUHSC_00806 | Putative uncharacterized protein                             | -2.04 | 2.93E-11 |
| SAOUHSC_02453 | lacC          | Tagatose-6-phosphate kinase                                  | -2.03 | 4.34E-05 |
| SAOUHSC_00191 | SAOUHSC_00191 | Putative uncharacterized protein                             | -2.02 | 2.09E-02 |
| SAOUHSC_03000 | SAOUHSC_03000 | "Capsular polysaccharide biosynthesis, capA, putative"       | -2.00 | 2.55E-03 |
| SAOUHSC_00716 | SAOUHSC_00716 | Putative uncharacterized protein                             | -2.00 | 2.78E-02 |
| SAOUHSC_03023 | drp35         | Lactonase drp35                                              | 2.01  | 9.53E-05 |
| SAOUHSC_01014 | SAOUHSC_01014 | Amidophosphoribosyltransferase                               | 2.01  | 3.90E-02 |
| SAOUHSC_02763 | SAOUHSC_02763 | "Peptide ABC transporter, ATP-binding protein, putative"     | 2.01  | 6.83E-07 |
| SAOUHSC_02820 | SAOUHSC_02820 | Putative uncharacterized protein                             | 2.01  | 1.26E-08 |
| SAOUHSC_02767 | SAOUHSC_02767 | "Peptide ABC transporter, peptide-binding protein, putative" | 2.01  | 5.23E-05 |
| SAOUHSC_01087 | SAOUHSC_01087 | "Iron compound ABC transporter, permease protein"            | 2.02  | 1.16E-03 |
| SAOUHSC_02994 | SAOUHSC_02994 | Putative uncharacterized protein                             | 2.02  | 1.06E-11 |
| SAOUHSC_01088 | SAOUHSC_01088 | Putative uncharacterized protein                             | 2.02  | 7.59E-04 |
| SAOUHSC_00532 | SAOUHSC_00532 | Putative uncharacterized protein                             | 2.03  | 4.41E-03 |
| SAOUHSC_01082 | isdC          | Iron-regulated surface determinant protein C                 | 2.03  | 1.17E-03 |
| SAOUHSC_01079 | isdB          | Iron-regulated surface determinant protein B                 | 2.03  | 2.93E-09 |
| SAOUHSC_00155 | ptsG          | PTS system glucose-specific EIICBA component                 | 2.04  | 9.04E-13 |
| SAOUHSC_02830 | SAOUHSC_02830 | "D-lactate dehydrogenase, putative"                          | 2.05  | 3.89E-08 |
| SAOUHSC_02330 | SAOUHSC_02330 | Phosphomethylpyrimidine kinase                               | 2.05  | 1.83E-13 |
| SAOUHSC_00205 | SAOUHSC_00205 | Putative uncharacterized protein                             | 2.06  | 3.77E-03 |
| SAOUHSC_00604 | SAOUHSC_00604 | Putative uncharacterized protein                             | 2.06  | 1.44E-03 |
| SAOUHSC_00139 | SAOUHSC_00139 | Putative uncharacterized protein                             | 2.07  | 2.46E-03 |
| SAOUHSC_02466 | SAOUHSC_02466 | Truncated MHC class II analog protein                        | 2.07  | 3.50E-07 |
| SAOUHSC_00748 | SAOUHSC_00748 | Putative uncharacterized protein                             | 2.08  | 1.67E-06 |
| SAOUHSC_02331 | tenA          | Putative thiaminase-2                                        | 2.08  | 2.25E-14 |
| SAOUHSC_00153 | SAOUHSC_00153 | "Indolepyruvate decarboxylase, putative"                     | 2.09  | 1.35E-02 |
| SAOUHSC_02936 | SAOUHSC_02936 | Putative uncharacterized protein                             | 2.11  | 5.93E-06 |
| SAOUHSC_00152 | SAOUHSC_00152 | Putative uncharacterized protein                             | 2.12  | 1.10E-02 |
| SAOUHSC_01854 | SAOUHSC_01854 | Putative uncharacterized protein                             | 2.12  | 9.48E-15 |
| SAOUHSC_02821 | SAOUHSC_02821 | "Membrane spanning protein, putative"                        | 2.13  | 1.77E-10 |
| SAOUHSC_00737 | SAOUHSC_00737 | Putative uncharacterized protein                             | 2.13  | 3.54E-03 |
| SAOUHSC_00848 | SAOUHSC_00848 | Putative uncharacterized protein                             | 2.15  | 2.19E-09 |
| SAOUHSC_02363 | SAOUHSC_02363 | Putative aldehyde dehydrogenase SAOUHSC_02363                | 2.17  | 8.45E-08 |
| SAOUHSC_00371 | SAOUHSC_00371 | Putative uncharacterized protein                             | 2.17  | 3.44E-04 |
| SAOUHSC_02754 | SAOUHSC_02754 | "ABC transporter, ATP-binding protein, putative"             | 2.18  | 2.13E-03 |
| SAOUHSC_00291 | SAOUHSC_00291 | "PfkB family carbohydrate kinase family, putative"           | 2.18  | 5.68E-03 |
| SAOUHSC_00749 | SAOUHSC_00749 | Putative uncharacterized protein                             | 2.19  | 3.21E-10 |
| SAOUHSC_01855 | SAOUHSC_01855 | UPF0478 protein SAOUHSC_01855                                | 2.22  | 1.02E-19 |
| SAOUHSC_02975 | SAOUHSC_02975 | "PTS system, fructose-specific IIAABC component, putative"   | 2.22  | 1.86E-03 |
| SAOUHSC_02329 | thiM          | Hydroxyethylthiazole kinase                                  | 2.23  | 1.85E-13 |
| SAOUHSC_00895 | SAOUHSC_00895 | Glutamate dehydrogenase                                      | 2.23  | 3.60E-04 |
| SAOUHSC_01847 | SAOUHSC_01847 | Putative uncharacterized protein                             | 2.24  | 4.98E-03 |
| SAOUHSC_02663 | SAOUHSC_02663 | Putative uncharacterized protein                             | 2.24  | 4.44E-04 |
| SAOUHSC_02803 | fnbA          | Fibronectin-binding protein A                                | 2.25  | 5.29E-09 |
| SAOUHSC_00285 | SAOUHSC_00285 | Putative uncharacterized protein                             | 2.26  | 3.68E-12 |
| SAOUHSC_00690 | SAOUHSC_00690 | Putative uncharacterized protein                             | 2.26  | 7.59E-18 |
| SAOUHSC_01849 | SAOUHSC_01849 | Putative uncharacterized protein                             | 2.26  | 9.57E-04 |
| SAOUHSC_03006 | lipA          | Lipase 1                                                     | 2.29  | 2.09E-03 |
| SAOUHSC_01416 | odhB          | Dihydrolipoyllysine-residue succinyltransferase component of | 2.29  | 3.42E-04 |

|               |               |                                                         |      |          |
|---------------|---------------|---------------------------------------------------------|------|----------|
| SAOUHSC_00180 | SAOUHSC_00180 | Putative uncharacterized protein                        | 2.30 | 1.01E-02 |
| SAOUHSC_02608 | SAOUHSC_02608 | Putative uncharacterized protein                        | 2.31 | 1.24E-03 |
| SAOUHSC_00847 | SAOUHSC_00847 | "ABC transporter, ATP-binding protein, putative"        | 2.31 | 1.95E-16 |
| SAOUHSC_01844 | SAOUHSC_01844 | Putative uncharacterized protein                        | 2.31 | 4.94E-02 |
| SAOUHSC_02661 | SAOUHSC_02661 | "PTS system sucrose-specific IIBC component, putative"  | 2.33 | 7.38E-14 |
| SAOUHSC_02409 | SAOUHSC_02409 | Arginase                                                | 2.34 | 2.42E-02 |
| SAOUHSC_01015 | purM          | Phosphoribosylformylglycinamide cyclo-ligase            | 2.34 | 3.00E-02 |
| SAOUHSC_01027 | SAOUHSC_01027 | Putative uncharacterized protein                        | 2.35 | 4.50E-14 |
| SAOUHSC_01922 | SAOUHSC_01922 | Putative uncharacterized protein                        | 2.36 | 9.54E-09 |
| SAOUHSC_01018 | purD          | Phosphoribosylamine--glycine ligase                     | 2.43 | 2.75E-06 |
| SAOUHSC_02013 | SAOUHSC_02013 | Uncharacterized protein SAOUHSC_02013                   | 2.43 | 1.98E-19 |
| SAOUHSC_00747 | SAOUHSC_00747 | Putative uncharacterized protein                        | 2.45 | 4.87E-12 |
| SAOUHSC_02662 | SAOUHSC_02662 | PTS system sucrose-specific IIBC component              | 2.46 | 2.00E-19 |
| SAOUHSC_01275 | SAOUHSC_01275 | Putative uncharacterized protein                        | 2.48 | 1.73E-03 |
| SAOUHSC_01318 | SAOUHSC_01318 | Putative uncharacterized protein                        | 2.48 | 4.04E-05 |
| SAOUHSC_01016 | SAOUHSC_01016 | "Phosphoribosylglycinamide formyltransferase, putative" | 2.51 | 1.99E-02 |
| SAOUHSC_00296 | SAOUHSC_00296 | ROK family protein                                      | 2.51 | 3.38E-02 |
| SAOUHSC_00658 | SAOUHSC_00658 | Putative uncharacterized protein                        | 2.53 | 1.40E-03 |
| SAOUHSC_00294 | SAOUHSC_00294 | Putative uncharacterized protein                        | 2.54 | 3.90E-02 |
| SAOUHSC_01017 | purH          | Bifunctional purine biosynthesis protein PurH           | 2.57 | 7.82E-04 |
| SAOUHSC_01418 | odhA          | 2-oxoglutarate dehydrogenase E1 component               | 2.57 | 3.40E-05 |
| SAOUHSC_02774 | SAOUHSC_02774 | Putative uncharacterized protein                        | 2.60 | 1.24E-11 |
| SAOUHSC_00746 | SAOUHSC_00746 | Putative uncharacterized protein                        | 2.62 | 2.50E-08 |
| SAOUHSC_00656 | SAOUHSC_00656 | Putative uncharacterized protein                        | 2.64 | 4.91E-03 |
| SAOUHSC_00310 | SAOUHSC_00310 | Putative uncharacterized protein                        | 2.66 | 2.15E-03 |
| SAOUHSC_00894 | rocD          | Ornithine aminotransferase                              | 2.66 | 1.66E-04 |
| SAOUHSC_02339 | SAOUHSC_02339 | Putative uncharacterized protein                        | 2.67 | 3.51E-05 |
| SAOUHSC_02899 | SAOUHSC_02899 | Putative uncharacterized protein                        | 2.68 | 1.37E-23 |
| SAOUHSC_02607 | hutU          | Urocanate hydratase                                     | 2.72 | 2.66E-03 |
| SAOUHSC_00037 | SAOUHSC_00037 | Putative uncharacterized protein                        | 2.72 | 1.19E-21 |
| SAOUHSC_01921 | SAOUHSC_01921 | Putative uncharacterized protein                        | 2.74 | 4.33E-09 |
| SAOUHSC_00655 | SAOUHSC_00655 | Putative uncharacterized protein                        | 2.76 | 9.29E-04 |
| SAOUHSC_00199 | SAOUHSC_00199 | Acetate CoA-transferase YdiF                            | 2.76 | 1.60E-03 |
| SAOUHSC_01918 | SAOUHSC_01918 | Putative uncharacterized protein                        | 2.89 | 1.22E-06 |
| SAOUHSC_01603 | SAOUHSC_01603 | Putative uncharacterized protein                        | 2.89 | 3.31E-04 |
| SAOUHSC_02848 | glcB          | PTS system glucoside-specific EIICBA component          | 2.90 | 2.77E-13 |
| SAOUHSC_02597 | SAOUHSC_02597 | "PTS system component, putative"                        | 2.90 | 9.53E-06 |
| SAOUHSC_00383 | SAOUHSC_00383 | Putative uncharacterized protein                        | 2.90 | 1.03E-11 |
| SAOUHSC_00309 | SAOUHSC_00309 | Putative uncharacterized protein                        | 2.92 | 3.45E-32 |
| SAOUHSC_00071 | SAOUHSC_00071 | "Lipoprotein, SirC, putative"                           | 2.97 | 1.76E-21 |
| SAOUHSC_03035 | SAOUHSC_03035 | Putative uncharacterized protein                        | 3.01 | 1.98E-23 |
| SAOUHSC_02610 | hutG          | Formimidoylglutamase                                    | 3.02 | 1.95E-23 |
| SAOUHSC_02925 | SAOUHSC_02925 | Putative uncharacterized protein                        | 3.06 | 2.90E-08 |
| SAOUHSC_02097 | SAOUHSC_02097 | Putative uncharacterized protein                        | 3.12 | 3.23E-21 |
| SAOUHSC_02729 | SAOUHSC_02729 | "Amino acid ABC transporter-like protein, putative"     | 3.14 | 6.25E-05 |
| SAOUHSC_02665 | SAOUHSC_02665 | Putative uncharacterized protein                        | 3.14 | 1.54E-18 |
| SAOUHSC_01919 | SAOUHSC_01919 | Putative uncharacterized protein                        | 3.15 | 3.38E-08 |
| SAOUHSC_02137 | sdcS          | Sodium-dependent dicarboxylate transporter SdcS         | 3.17 | 4.72E-17 |
| SAOUHSC_02822 | fbp           | "Fructose-1,6-bisphosphatase class 3"                   | 3.17 | 1.14E-03 |
| SAOUHSC_00156 | SAOUHSC_00156 | Putative uncharacterized protein                        | 3.18 | 4.41E-05 |
| SAOUHSC_01920 | SAOUHSC_01920 | Putative uncharacterized protein                        | 3.23 | 1.38E-15 |
| SAOUHSC_02425 | SAOUHSC_02425 | UPF0457 protein SAOUHSC_02425                           | 3.26 | 4.86E-05 |



|                |                 |                                                                |      |          |
|----------------|-----------------|----------------------------------------------------------------|------|----------|
| SAOUHSC_02799  | sarT            | HTH-type transcriptional regulator SarT                        | 3.35 | 5.41E-05 |
| SAOUHSC_02753  | SAOUHSC_02753   | "Membrane protein, putative"                                   | 3.38 | 1.44E-13 |
| SAOUHSC_00632  | mnhG2           | Putative antiporter subunit mnhG2                              | 3.42 | 8.90E-17 |
| SAOUHSC_00160  | SAOUHSC_00160   | Putative uncharacterized protein                               | 3.46 | 2.96E-07 |
| SAOUHSC_02930  | SAOUHSC_02930   | Putative uncharacterized protein                               | 3.46 | 4.53E-16 |
| SAOUHSC_00630  | SAOUHSC_00630   | Putative uncharacterized protein                               | 3.51 | 1.99E-20 |
| SAOUHSC_00629  | mnhE2           | Putative antiporter subunit mnhE2                              | 3.58 | 2.47E-15 |
| SAOUHSC_02869  | rocA            | 1-pyrroline-5-carboxylate dehydrogenase                        | 3.59 | 4.63E-04 |
| SAOUHSC_00198  | SAOUHSC_00198   | Putative uncharacterized protein                               | 3.66 | 6.96E-04 |
| SAOUHSC_A02680 | SAOUHSC_02822.1 | Putative uncharacterized protein                               | 3.69 | 7.84E-04 |
| SAOUHSC_00626  | mnhB2           | Putative antiporter subunit mnhB2                              | 3.70 | 2.15E-15 |
| SAOUHSC_00628  | mnhD2           | Putative antiporter subunit mnhD2                              | 3.75 | 2.23E-25 |
| SAOUHSC_00317  | SAOUHSC_00317   | Glycerol-3-phosphate transporter                               | 3.78 | 6.90E-10 |
| SAOUHSC_00736  | SAOUHSC_00736   | Putative lipid kinase SAOUHSC_00736                            | 3.78 | 3.09E-28 |
| SAOUHSC_00812  | clfA            | Clumping factor A                                              | 3.82 | 4.54E-23 |
| SAOUHSC_00627  | mnhC2           | Putative antiporter subunit mnhC2                              | 3.97 | 1.02E-19 |
| SAOUHSC_02863  | SAOUHSC_02863   | Putative uncharacterized protein                               | 3.97 | 1.68E-30 |
| SAOUHSC_01602  | SAOUHSC_01602   | "Transcriptional regulator, putative"                          | 3.98 | 3.59E-06 |
| SAOUHSC_01024  | SAOUHSC_01024   | Putative uncharacterized protein                               | 4.03 | 5.53E-06 |
| SAOUHSC_01601  | SAOUHSC_01601   | "Alpha-glucosidase, putative"                                  | 4.10 | 1.90E-07 |
| SAOUHSC_00196  | SAOUHSC_00196   | Putative uncharacterized protein                               | 4.12 | 4.20E-04 |
| SAOUHSC_00157  | murQ            | N-acetylmuramic acid 6-phosphate etherase                      | 4.18 | 1.77E-06 |
| SAOUHSC_01846  | SAOUHSC_01846   | "Acetyl-CoA synthetase, putative"                              | 4.19 | 4.25E-05 |
| SAOUHSC_00625  | mnhA2           | Putative antiporter subunit mnhA2                              | 4.29 | 4.23E-46 |
| SAOUHSC_00569  | SAOUHSC_00569   | Putative uncharacterized protein                               | 4.33 | 7.03E-40 |
| SAOUHSC_00158  | SAOUHSC_00158   | PTS system EIIBC component SAOUHSC_00158                       | 4.35 | 1.09E-07 |
| SAOUHSC_01884  | SAOUHSC_01884   | Putative uncharacterized protein                               | 4.36 | 1.36E-04 |
| SAOUHSC_00179  | SAOUHSC_00179   | Putative uncharacterized protein                               | 4.37 | 1.80E-04 |
| SAOUHSC_00825  | SAOUHSC_00825   | Putative uncharacterized protein                               | 4.37 | 2.78E-36 |
| SAOUHSC_02815  | SAOUHSC_02815   | Putative uncharacterized protein                               | 4.38 | 2.90E-08 |
| SAOUHSC_02900  | SAOUHSC_02900   | Uncharacterized hydrolase SAOUHSC_02900                        | 4.43 | 2.82E-60 |
| SAOUHSC_03032  | SAOUHSC_03032   | Putative uncharacterized protein                               | 4.46 | 6.47E-21 |
| SAOUHSC_02604  | SAOUHSC_02604   | Putative uncharacterized protein                               | 4.64 | 1.19E-64 |
| SAOUHSC_00070  | sarS            | HTH-type transcriptional regulator SarS                        | 4.73 | 7.12E-10 |
| SAOUHSC_02809  | SAOUHSC_02809   | "Gluconate operon transcriptional repressor, putative"         | 4.82 | 2.57E-06 |
| SAOUHSC_02440  | SAOUHSC_02440   | Putative uncharacterized protein                               | 4.88 | 1.12E-04 |
| SAOUHSC_01910  | pckA            | Phosphoenolpyruvate carboxykinase [ATP]                        | 4.92 | 7.37E-07 |
| SAOUHSC_00061  | SAOUHSC_00061   | Putative uncharacterized protein                               | 4.97 | 3.31E-57 |
| SAOUHSC_00175  | SAOUHSC_00175   | "Multiple sugar-binding transport ATP-binding protein, putativ | 5.19 | 4.97E-06 |
| SAOUHSC_00311  | SAOUHSC_00311   | Putative uncharacterized protein                               | 5.24 | 1.73E-04 |
| SAOUHSC_00069  | spa             | Immunoglobulin G-binding protein A                             | 5.40 | 8.93E-13 |
| SAOUHSC_02771  | SAOUHSC_02771   | Putative uncharacterized protein                               | 5.46 | 2.23E-18 |
| SAOUHSC_01794  | SAOUHSC_01794   | "Glyceraldehyde-3-phosphate dehydrogenase, type I"             | 5.80 | 6.92E-11 |
| SAOUHSC_02908  | SAOUHSC_02908   | Putative uncharacterized protein                               | 5.89 | 8.09E-49 |
| SAOUHSC_00826  | SAOUHSC_00826   | Putative uncharacterized protein                               | 5.92 | 5.39E-51 |
| SAOUHSC_02877  | crtN            | Dehydrosqualene desaturase                                     | 5.93 | 2.91E-51 |
| SAOUHSC_02808  | SAOUHSC_02808   | Gluconate kinase                                               | 6.39 | 6.98E-03 |
| SAOUHSC_03028  | SAOUHSC_03028   | Putative uncharacterized protein                               | 6.42 | 3.48E-34 |
| SAOUHSC_02772  | SAOUHSC_02772   | Putative uncharacterized protein                               | 6.49 | 7.77E-32 |
| SAOUHSC_00312  | SAOUHSC_00312   | Putative uncharacterized protein                               | 6.73 | 2.78E-02 |
| SAOUHSC_02806  | SAOUHSC_02806   | "Gluconate permease, putative"                                 | 7.11 | 2.21E-08 |
| SAOUHSC_00624  | SAOUHSC_00624   | "Integrase/recombinase, putative"                              | 7.23 | 2.68E-57 |

|                |                 |                                                              |       |           |
|----------------|-----------------|--------------------------------------------------------------|-------|-----------|
| SAOUHSC_00183  | SAOUHSC_00183   | "Membrane protein, putative"                                 | 7.31  | 1.18E-15  |
| SAOUHSC_00176  | SAOUHSC_00176   | "Bacterial extracellular solute-binding protein, putative"   | 7.77  | 2.08E-02  |
| SAOUHSC_02812  | SAOUHSC_02812   | Putative uncharacterized protein                             | 7.98  | 1.32E-72  |
| SAOUHSC_02400  | SAOUHSC_02400   | "PTS system, mannitol-specific component, putative"          | 8.23  | 1.50E-13  |
| SAOUHSC_00177  | SAOUHSC_00177   | "Maltose ABC transporter, permease protein, putative"        | 8.41  | 7.15E-03  |
| SAOUHSC_00846  | SAOUHSC_00846   | Putative uncharacterized protein                             | 8.59  | 6.06E-82  |
| SAOUHSC_00178  | SAOUHSC_00178   | "Maltose ABC transporter, permease protein"                  | 8.60  | 3.24E-03  |
| SAOUHSC_02403  | mtID            | Mannitol-1-phosphate 5-dehydrogenase                         | 8.74  | 2.87E-23  |
| SAOUHSC_02882  | crtO            | "Glycosyl-4,4'-diaponeurosporenoate acyltransferase"         | 8.93  | 4.56E-14  |
| SAOUHSC_00831  | SAOUHSC_00831   | Organic hydroperoxide resistance protein-like                | 9.45  | 2.42E-60  |
| SAOUHSC_02401  | SAOUHSC_02401   | Putative uncharacterized protein                             | 9.77  | 1.99E-14  |
| SAOUHSC_02881  | crtP            | Diapolycopene oxygenase                                      | 10.10 | 1.13E-13  |
| SAOUHSC_02879  | crtM            | Dehydrosqualene synthase                                     | 10.17 | 6.60E-88  |
| SAOUHSC_02402  | SAOUHSC_02402   | "PTS system, mannitol-specific IIa component, putative"      | 11.06 | 3.94E-20  |
| SAOUHSC_02387  | SAOUHSC_02387   | Putative uncharacterized protein                             | 11.15 | 5.60E-97  |
| SAOUHSC_00356  | SAOUHSC_00356   | Putative uncharacterized protein                             | 11.49 | 2.50E-66  |
| SAOUHSC_00358  | SAOUHSC_00358   | Putative uncharacterized protein                             | 12.22 | 7.92E-85  |
| SAOUHSC_02880  | crtQ            | "4,4'-diaponeurosporenoate glycosyltransferase"              | 13.11 | 1.33E-52  |
| SAOUHSC_A00354 | SAOUHSC_00358.1 | Putative uncharacterized protein                             | 13.93 | 9.78E-44  |
| SAOUHSC_02862  | clpL            | ATP-dependent Clp protease ATP-binding subunit ClpL          | 16.79 | 1.28E-231 |
| SAOUHSC_01729  | SAOUHSC_01729   | Putative uncharacterized protein                             | 18.24 | 1.86E-105 |
| SAOUHSC_01730  | SAOUHSC_01730   | UPF0337 protein SAOUHSC_01730                                | 19.71 | 3.15E-197 |
| SAOUHSC_02444  | SAOUHSC_02444   | "Osmoprotectant transporter, BCCT family, opuD-like protein, | 19.92 | 1.15E-144 |
| SAOUHSC_00619  | SAOUHSC_00619   | Putative uncharacterized protein                             | 21.10 | 2.64E-196 |
| SAOUHSC_02442  | SAOUHSC_02442   | Putative uncharacterized protein                             | 27.27 | 1.58E-186 |
| SAOUHSC_02441  | asp23           | Alkaline shock protein 23                                    | 28.18 | 2.18E-286 |
| SAOUHSC_02443  | SAOUHSC_02443   | Putative uncharacterized protein                             | 29.88 | 1.28E-231 |
| SAOUHSC_00845  | SAOUHSC_00845   | UPF0337 protein SAOUHSC_00845                                | 31.38 | 5.63E-205 |

\* Genes highlighted in grey correspond to genes dysregulated in this lysogen but not in the phi11 lysogenic strain

Table S3. Normalized mean reads per kilobase million (RPKM) values corresponding to the different open reading frames (ORFs) of  $\Phi$ 11 genome in samples of strain RN450- $\Phi$ 11

| gene_ID  | start_coord | end_coord | phi11-1 Reads | phi11-2 Reads | phi11-3 Reads | phi11-1 RPKM | phi11-2 RPKM | phi11-3 RPKM | RPKM MEAN   | RPKM ESTAND.gene_name               |
|----------|-------------|-----------|---------------|---------------|---------------|--------------|--------------|--------------|-------------|-------------------------------------|
| phi11_01 | 83          | 1129      | 2506          | 2033          | 1083          | 12992        | 9385         | 6630         | 9669        | 3190.494162 integrase               |
| phi11_02 | 1241        | 1441      | 896           | 822           | 569           | 24196        | 19765        | 18144        | 20701.66667 | 3132.83966 excisionase              |
| phi11_03 | 1378        | 2283      | 10055         | 9648          | 6842          | 60240        | 51468        | 48402        | 53370       | 6143.920898 PV83 orf 3-like protei  |
| phi11_04 | 2319        | 2504      | 1764          | 1411          | 1186          | 51477        | 36664        | 40868        | 43003       | 7633.800561 PV83 orf 4-like protei  |
| phi11_05 | 2901        | 3620      | 7063          | 6399          | 5458          | 53246        | 42954        | 48586        | 48262       | 5153.644148 cl-like repressor       |
| phi11_06 | 3762        | 3980      | 1307          | 1493          | 1062          | 32394        | 32949        | 31081        | 32141.33333 | 959.289494 cro-like repressor       |
| phi11_07 | 4427        | 5251      | 5420          | 5923          | 4727          | 35660        | 34699        | 36723        | 35694       | 1012.428269 anti-repressor          |
| phi11_08 | 5252        | 5476      | 1262          | 1222          | 1082          | 30444        | 26249        | 30822        | 29171.66667 | 2538.150179 phi11_08                |
| phi11_09 | 5518        | 5967      | 3391          | 4156          | 3029          | 40902        | 44637        | 43142        | 42893.66667 | 1879.842635 phi PV83 orf 10-like p  |
| phi11_10 | 5981        | 6202      | 3158          | 4051          | 2895          | 77213        | 88194        | 83581        | 82996       | 5513.824353 phi PV83 orf 12-like p  |
| phi11_11 | 6696        | 7016      | 473           | 657           | 482           | 7998         | 9892         | 9624         | 9171.333333 | 1024.933819 phi PVL orf 39-like pr  |
| phi11_12 | 7566        | 8345      | 4210          | 4701          | 3756          | 29297        | 29129        | 30863        | 29763       | 956.3242128 phi ETA orf 17-like pr  |
| phi11_13 | 8375        | 8929      | 3324          | 4191          | 2975          | 32509        | 36497        | 34356        | 34454       | 1995.805351 ssb                     |
| phi11_14 | 8942        | 9634      | 3489          | 4338          | 3094          | 27327        | 30254        | 28615        | 28732       | 1467.003408 phi PV83 orf 19-like p  |
| phi11_15 | 9606        | 10412     | 3879          | 4462          | 3441          | 26090        | 26723        | 27329        | 26714       | 619.5490295 phi PV83 orf 20-like p  |
| phi11_16 | 10765       | 12006     | 7167          | 8479          | 6286          | 31322        | 32995        | 32439        | 32252       | 852.0322764 helicase DnaB           |
| phi11_17 | 12222       | 12443     | 1146          | 1316          | 999           | 28020        | 28650        | 28842        | 28504       | 430.0093022 phi ETA orf 24-like pr  |
| phi11_18 | 12454       | 12858     | 1524          | 2095          | 1519          | 20425        | 25001        | 24039        | 23155       | 2412.682325 phi ETA orf 25-like pr  |
| phi11_19 | 12863       | 13048     | 844           | 1122          | 917           | 24630        | 29155        | 31599        | 28461.33333 | 3535.904458 PV83 orf 23-like prote  |
| phi11_20 | 13049       | 13318     | 1079          | 1421          | 1147          | 21691        | 25437        | 27228        | 24785.33333 | 2825.437016 HTH DNA binding pro     |
| phi11_21 | 13319       | 13678     | 1168          | 1494          | 1276          | 17610        | 20058        | 22717        | 20128.33333 | 2554.226367 phi PVL orf 50-like pr  |
| phi11_22 | 13679       | 13927     | 1276          | 1523          | 1120          | 27815        | 29562        | 28829        | 28735.33333 | 877.2584188 phi PVL orf 51-like pr  |
| phi11_23 | 13933       | 14187     | 1365          | 1562          | 1325          | 29055        | 29605        | 33303        | 30654.33333 | 2310.238372 phi PVL orf 52-like pr  |
| phi11_24 | 14184       | 14426     | 1082          | 1300          | 1120          | 24169        | 25856        | 29541        | 26522       | 2747.22824 ETA orf 33-like protei   |
| phi11_25 | 14419       | 14928     | 2671          | 3217          | 2772          | 28427        | 30487        | 34836        | 31250       | 3271.917939 dUTPase                 |
| phi11_26 | 15037       | 15210     | 407           | 471           | 420           | 12696        | 13083        | 15471        | 13750       | 1502.938122 phi SLT orf 81b-like pi |
| phi11_27 | 15558       | 15746     | 703           | 872           | 706           | 20189        | 22299        | 23942        | 22143.33333 | 1881.336316 rinB                    |
| phi11_28 | 15917       | 16339     | 1912          | 2743          | 2030          | 24535        | 31341        | 30759        | 28878.33333 | 3772.67668 rinA                     |
| phi11_29 | 16526       | 16966     | 385           | 686           | 552           | 4739         | 7518         | 8023         | 6760        | 1768.357147 small terminase         |
| phi11_30 | 16887       | 18230     | 1581          | 2634          | 2267          | 6385         | 9472         | 10811        | 8889.333333 | 2269.800505 large terminase         |
| phi11_31 | 18241       | 19776     | 2389          | 3576          | 2971          | 8442         | 11252        | 12397        | 10697       | 2035.073709 phi Mu50B-like prote    |
| phi11_32 | 19894       | 20778     | 1302          | 1930          | 1840          | 7985         | 10540        | 13326        | 10617       | 2671.332439 phi Mu50B-like prote    |
| phi11_33 | 21115       | 21750     | 3419          | 5277          | 5138          | 29179        | 40101        | 51778        | 40352.66667 | 11301.60176 phi Mu50B-like prote    |
| phi11_34 | 21764       | 22738     | 4957          | 8108          | 6858          | 27596        | 40192        | 45082        | 37623.33333 | 9021.562245 head protein            |
| phi11_35 | 22760       | 23047     | 874           | 1562          | 1304          | 16472        | 26213        | 29020        | 23901.66667 | 6585.573045 phi Mu50B-like prote    |
| phi11_36 | 23056       | 23388     | 1095          | 2097          | 1726          | 17848        | 30436        | 33221        | 27168.33333 | 8190.880071 phi Mu50B-like prote    |
| phi11_37 | 23687       | 24034     | 1713          | 2852          | 2472          | 26718        | 39609        | 45528        | 37285       | 9617.939332 phi Mu50B-like prote    |
| phi11_38 | 24046       | 24429     | 1522          | 2280          | 1859          | 21514        | 28697        | 31028        | 27079.66667 | 4958.918666 phi Mu50B-like prote    |
| phi11_39 | 24448       | 25029     | 2594          | 3798          | 3421          | 24192        | 31540        | 37674        | 31135.33333 | 6750.103505 structural phi Mu50B    |
| phi11_40 | 25091       | 25456     | 991           | 1571          | 1443          | 14697        | 20746        | 25269        | 20237.33333 | 5304.323928 phi11_40                |
| phi11_41 | 25486       | 25830     | 994           | 1641          | 1482          | 15639        | 22989        | 27532        | 22053.33333 | 6001.455351 phi11_41                |
| phi11_42 | 26582       | 29314     | 8024          | 11459         | 9620          | 15936        | 20265        | 22560        | 19587       | 3363.644898 tape measure proteir    |
| phi11_43 | 29327       | 30274     | 2796          | 3880          | 3386          | 16009        | 19781        | 22892        | 19560.66667 | 3446.785797 phi ETA orf 54-like pr  |
| phi11_44 | 30283       | 32184     | 3977          | 5271          | 4712          | 11349        | 13394        | 15878        | 13540.33333 | 2268.043283 phi ETA orf 55-like pr  |
| phi11_45 | 32199       | 34109     | 3926          | 5698          | 4762          | 11151        | 14411        | 15971        | 13844.33333 | 2459.457935 phi ETA orf 56-like pr  |
| phi11_46 | 35932       | 36309     | 532           | 689           | 608           | 7639         | 8810         | 10309        | 8919.333333 | 1338.353591 phi105 orf 44-like prc  |

|          |       |       |      |      |      |       |       |       |                    |             |                         |
|----------|-------|-------|------|------|------|-------|-------|-------|--------------------|-------------|-------------------------|
| phi11_47 | 36313 | 36486 | 211  | 241  | 211  | 6582  | 6694  | 7772  | <b>7016</b>        | 657.1057754 | phi ETA orf 58-like pr  |
| phi11_48 | 36526 | 36825 | 342  | 550  | 448  | 6188  | 8861  | 9571  | <b>8206.666667</b> | 1783.896391 | phi SLT orf 99-like prc |
| phi11_49 | 36962 | 38860 | 3200 | 5130 | 4143 | 9147  | 13056 | 13983 | <b>12062</b>       | 2566.66145  | cell wall hydrolase     |
| phi11_50 | 38873 | 40045 | 2234 | 3125 | 2565 | 10337 | 12876 | 14015 | <b>12409.33333</b> | 1882.884578 | tail fiber              |
| phi11_51 | 40051 | 40446 | 1378 | 1990 | 1505 | 18888 | 24288 | 24359 | <b>22511.66667</b> | 3138.388174 | phi ETA orf 63-like pr  |
| phi11_52 | 40502 | 40939 | 863  | 1228 | 1050 | 10695 | 13550 | 15365 | <b>13203.33333</b> | 2354.221386 | holin                   |
| phi11_53 | 40920 | 42365 | 3572 | 4509 | 3873 | 13408 | 15071 | 17167 | <b>15215.33333</b> | 1883.651861 | amidase                 |

Table S4. Normalized mean reads per kilobase million (RPKM) values corresponding to the different open reading frames (ORFs) of  $\Phi$ 80 $\alpha$  genome in samples of strain RN450- $\Phi$ 80 $\alpha$

| gene_ID      | start_coord | end_coord | phi80-1 Reads | phi80-2 Reads | phi80-3 Reads | phi80-1 RPKM | phi80-2 RPKM | phi80-3 RPKM | RPKM MEAN           | RPKM ESTAND.gene_name             |
|--------------|-------------|-----------|---------------|---------------|---------------|--------------|--------------|--------------|---------------------|-----------------------------------|
| SPV-80A_gp01 | 32          | 1417      | 17180         | 8997          | 6710          | 59202        | 34948        | 26071        | <b>40073.66667</b>  | 17149.93103 int                   |
| SPV-80A_gp02 | 1525        | 1725      | 5870          | 4017          | 4490          | 139482       | 107594       | 120296       | <b>122457.33333</b> | 16053.49362 xis                   |
| SPV-80A_gp03 | 1662        | 2567      | 66096         | 55552         | 55700         | 348435       | 330107       | 331075       | <b>336539</b>       | 10313.60112 hypothetical protein  |
| SPV-80A_gp04 | 2603        | 2788      | 15034         | 12040         | 10498         | 386044       | 348495       | 303944       | <b>346161</b>       | 41099.73439 hypothetical protein  |
| SPV-80A_gp05 | 2948        | 3115      | 19816         | 17151         | 15551         | 563355       | 549621       | 498481       | <b>537152.33333</b> | 34187.12777 hypothetical protein  |
| SPV-80A_gp06 | 3185        | 3901      | 85840         | 78565         | 76483         | 571802       | 589920       | 574441       | <b>578721</b>       | 9787.966132 Cl-like repressor     |
| SPV-80A_gp07 | 4065        | 4307      | 2183          | 1450          | 1127          | 42906        | 32125        | 24976        | <b>33335.66667</b>  | 9026.101613 cro-like repressor    |
| SPV-80A_gp08 | 4323        | 5111      | 10593         | 6984          | 5787          | 64123        | 47655        | 39498        | <b>50425.33333</b>  | 12544.07096 antirepressor         |
| SPV-80A_gp09 | 5127        | 5321      | 2347          | 1680          | 1349          | 57485        | 46383        | 37254        | <b>47040.66667</b>  | 10131.52182 hypothetical protein  |
| SPV-80A_gp10 | 5374        | 5550      | 1400          | 1208          | 1193          | 37777        | 36743        | 36297        | <b>36939</b>        | 759.2180188 hypothetical protein  |
| SPV-80A_gp11 | 5525        | 5755      | 2510          | 2584          | 3177          | 51896        | 60223        | 74064        | <b>62061</b>        | 11197.71133 hypothetical protein  |
| SPV-80A_gp12 | 5814        | 5942      | 1286          | 993           | 976           | 47613        | 41442        | 40744        | <b>43266.33333</b>  | 3780.467476 hypothetical protein  |
| SPV-80A_gp13 | 5935        | 6096      | 983           | 655           | 464           | 28981        | 21768        | 15424        | <b>22057.66667</b>  | 6783.1403 hypothetical protein    |
| SPV-80A_gp14 | 6188        | 6448      | 1797          | 1154          | 1002          | 32884        | 23804        | 20674        | <b>25787.33333</b>  | 6342.021234 hypothetical protein  |
| SPV-80A_gp15 | 6458        | 6679      | 1879          | 1344          | 1110          | 40425        | 32593        | 26926        | <b>33314.66667</b>  | 6778.373871 hypothetical protein  |
| SPV-80A_gp16 | 6672        | 7295      | 4461          | 3097          | 2342          | 34145        | 26720        | 20212        | <b>27025.66667</b>  | 6971.527547 e12                   |
| SPV-80A_gp17 | 7295        | 7723      | 3165          | 2049          | 1638          | 35236        | 25714        | 20562        | <b>27170.66667</b>  | 7444.660995 ssb                   |
| SPV-80A_gp18 | 7737        | 8411      | 5083          | 3431          | 2738          | 35966        | 27365        | 21844        | <b>28391.66667</b>  | 7116.758696 hypothetical protein  |
| SPV-80A_gp19 | 8517        | 9374      | 33807         | 37725         | 44525         | 188189       | 236714       | 279458       | <b>234787</b>       | 45665.00396 hypothetical protein  |
| SPV-80A_gp20 | 9439        | 10209     | 3785          | 3010          | 2626          | 23447        | 21018        | 18342        | <b>20935.66667</b>  | 2553.495709 hypothetical protein  |
| SPV-80A_gp21 | 10219       | 10998     | 3490          | 2534          | 2149          | 21370        | 17490        | 14837        | <b>17899</b>        | 3285.648033 DnaC                  |
| SPV-80A_gp22 | 10992       | 11150     | 703           | 496           | 415           | 21117        | 16795        | 14056        | <b>17322.66667</b>  | 3559.951451 hypothetical protein  |
| SPV-80A_gp23 | 11163       | 11384     | 996           | 696           | 579           | 21428        | 16879        | 14045        | <b>17450.66667</b>  | 3724.550219 hypothetical protein  |
| SPV-80A_gp24 | 11394       | 11801     | 1337          | 1016          | 890           | 15651        | 13407        | 11747        | <b>13601.66667</b>  | 1959.266529 RusA                  |
| SPV-80A_gp25 | 11801       | 11986     | 511           | 375           | 348           | 13121        | 10854        | 10075        | <b>11350</b>        | 1582.416191 hypothetical protein  |
| SPV-80A_gp26 | 11987       | 12346     | 807           | 604           | 509           | 10706        | 9033         | 7614         | <b>9117.666667</b>  | 1547.737812 hypothetical protein  |
| SPV-80A_gp27 | 12347       | 12595     | 774           | 614           | 501           | 14846        | 13276        | 10835        | <b>12985.66667</b>  | 2021.200221 hypothetical protein  |
| SPV-80A_gp28 | 12610       | 13011     | 1061          | 749           | 648           | 12606        | 10031        | 8681         | <b>10439.33333</b>  | 1994.105898 hypothetical protein  |
| SPV-80A_gp29 | 13008       | 13355     | 880           | 679           | 672           | 12078        | 10504        | 10399        | <b>10993.66667</b>  | 940.5266255 hypothetical protein  |
| SPV-80A_gp30 | 13352       | 13660     | 388           | 304           | 261           | 5997         | 5297         | 4549         | <b>5281</b>         | 724.1325845 53 ORF 49-like protei |
| SPV-80A_gp31 | 13653       | 13889     | 409           | 285           | 256           | 8242         | 6474         | 5817         | <b>6844.333333</b>  | 1254.199479 hypothetical protein  |
| SPV-80A_gp32 | 13894       | 14406     | 736           | 630           | 588           | 6852         | 6612         | 6172         | <b>6545.333333</b>  | 344.8671242 dUTPase               |
| SPV-80A_gp33 | 14443       | 14649     | 246           | 170           | 161           | 5676         | 4421         | 4188         | <b>4761.666667</b>  | 800.3601273 hypothetical protein  |
| SPV-80A_gp34 | 14646       | 14849     | 216           | 144           | 148           | 5057         | 3800         | 3907         | <b>4254.666667</b>  | 696.8976491 hypothetical protein  |
| SPV-80A_gp35 | 14842       | 15078     | 354           | 281           | 258           | 7134         | 6383         | 5862         | <b>6459.666667</b>  | 639.4562795 hypothetical protein  |
| SPV-80A_gp36 | 15071       | 15457     | 888           | 813           | 645           | 10959        | 11310        | 8975         | <b>10414.66667</b>  | 1259.079161 hypothetical protein  |
| SPV-80A_gp37 | 15454       | 15627     | 291           | 231           | 187           | 7988         | 7147         | 5788         | <b>6974.333333</b>  | 1110.117261 rinB                  |
| SPV-80A_gp38 | 15628       | 15774     | 313           | 243           | 199           | 10170        | 8900         | 7290         | <b>8786.666667</b>  | 1443.341032 rinMiddle             |
| SPV-80A_gp39 | 15798       | 16220     | 1003          | 841           | 762           | 11325        | 10704        | 9701         | <b>10576.66667</b>  | 819.4536798 rinA                  |
| SPV-80A_gp40 | 16407       | 16847     | 640           | 690           | 688           | 6931         | 8424         | 8401         | <b>7918.666667</b>  | 855.4217284 terminase small subu  |
| SPV-80A_gp41 | 16768       | 18111     | 2279          | 2895          | 3002          | 8099         | 11597        | 12028        | <b>10574.66667</b>  | 2154.793339 terminase large subu  |
| SPV-80A_gp42 | 18122       | 19657     | 2347          | 3147          | 3528          | 7298         | 11030        | 12369        | <b>10232.33333</b>  | 2627.920154 portal protein        |
| SPV-80A_gp43 | 19545       | 19730     | 63            | 66            | 77            | 1618         | 1910         | 2229         | <b>1919</b>         | 305.599411 hypothetical protein   |
| SPV-80A_gp44 | 19664       | 20659     | 1332          | 1968          | 2112          | 6387         | 10638        | 11419        | <b>9481.333333</b>  | 2708.073916 minor head protein    |
| SPV-80A_gp45 | 20732       | 20902     | 271           | 345           | 363           | 7569         | 10862        | 11432        | <b>9954.333333</b>  | 2085.326433 hypothetical protein  |
| SPV-80A_gp46 | 21011       | 21631     | 2539          | 3360          | 3645          | 19527        | 29129        | 31609        | <b>26755</b>        | 6381.268526 scaffold protein      |

|              |       |       |       |       |       |       |        |        |                    |             |                       |
|--------------|-------|-------|-------|-------|-------|-------|--------|--------|--------------------|-------------|-----------------------|
| SPV-80A_gp47 | 21645 | 22619 | 3744  | 4966  | 5704  | 18340 | 27421  | 31505  | <b>25755.33333</b> | 6738.704648 | major head protein    |
| SPV-80A_gp48 | 22641 | 22928 | 568   | 739   | 876   | 9420  | 13814  | 16380  | <b>13204.66667</b> | 3519.782001 | hypothetical protein  |
| SPV-80A_gp49 | 22937 | 23269 | 796   | 867   | 964   | 11417 | 14017  | 15590  | <b>13674.66667</b> | 2107.457315 | hypothetical protein  |
| SPV-80A_gp50 | 23266 | 23568 | 1117  | 1185  | 1310  | 17607 | 21055  | 23282  | <b>20648</b>       | 2859.308133 | hypothetical protein  |
| SPV-80A_gp51 | 23568 | 23915 | 1240  | 1342  | 1503  | 17018 | 20761  | 23258  | <b>20345.66667</b> | 3140.664951 | hypothetical protein  |
| SPV-80A_gp52 | 23927 | 24310 | 1014  | 1096  | 1294  | 12612 | 15366  | 18147  | <b>15375</b>       | 2767.510976 | hypothetical protein  |
| SPV-80A_gp53 | 24329 | 24910 | 1825  | 1922  | 2127  | 14977 | 17779  | 19681  | <b>17479</b>       | 2366.305982 | major tail protein    |
| SPV-80A_gp54 | 24972 | 25337 | 541   | 639   | 672   | 7060  | 9399   | 9888   | <b>8782.333333</b> | 1511.490765 | hypothetical protein  |
| SPV-80A_gp55 | 25367 | 25711 | 563   | 627   | 638   | 7794  | 9784   | 9959   | <b>9179</b>        | 1202.632529 | hypothetical protein  |
| SPV-80A_gp56 | 25728 | 29192 | 3497  | 3833  | 4244  | 4820  | 5956   | 6596   | <b>5790.666667</b> | 899.4694733 | tape measure protein  |
| SPV-80A_gp57 | 27980 | 28372 | 188   | 213   | 248   | 2285  | 2918   | 3398   | <b>2867</b>        | 558.249944  | inside tape protein   |
| SPV-80A_gp58 | 29205 | 30152 | 1872  | 1980  | 2049  | 9431  | 11244  | 11639  | <b>10771.33333</b> | 1177.444832 | hypothetical protein  |
| SPV-80A_gp59 | 30161 | 32062 | 2315  | 2447  | 2644  | 5813  | 6926   | 7486   | <b>6741.666667</b> | 851.5963441 | hypothetical protein  |
| SPV-80A_gp60 | 31875 | 32084 | 89    | 78    | 68    | 2024  | 2000   | 1744   | <b>1922.666667</b> | 155.1945016 | hypothetical protein  |
| SPV-80A_gp61 | 32077 | 33987 | 2476  | 2484  | 2654  | 6188  | 6998   | 7479   | <b>6888.333333</b> | 652.4494872 | minor structure prote |
| SPV-80A_gp62 | 33987 | 35810 | 1827  | 1753  | 1975  | 4784  | 5174   | 5831   | <b>5263</b>        | 529.1436478 | hypothetical protein  |
| SPV-80A_gp63 | 35284 | 35505 | 48    | 0     | 0     | 1033  | 0      | 0      | <b>344.3333333</b> | 596.4028281 | hypothetical protein  |
| SPV-80A_gp64 | 35810 | 36187 | 398   | 299   | 346   | 5029  | 4259   | 4929   | <b>4739</b>        | 418.6884283 | hypothetical protein  |
| SPV-80A_gp65 | 36188 | 36370 | 131   | 109   | 116   | 3419  | 3207   | 3414   | <b>3346.666667</b> | 120.9807147 | hypothetical protein  |
| SPV-80A_gp66 | 36411 | 36710 | 237   | 241   | 272   | 3773  | 4325   | 4883   | <b>4327</b>        | 555.0027027 | hypothetical protein  |
| SPV-80A_gp67 | 36847 | 38745 | 2046  | 2048  | 2160  | 5146  | 5806   | 6125   | <b>5692.333333</b> | 499.2998431 | lyz                   |
| SPV-80A_gp68 | 38758 | 39930 | 1110  | 1160  | 1143  | 4520  | 5324   | 5247   | <b>5030.333333</b> | 443.6353608 | tail fiber protein    |
| SPV-80A_gp69 | 39936 | 40331 | 599   | 585   | 585   | 7224  | 7953   | 7955   | <b>7710.666667</b> | 421.4668828 | hypothetical protein  |
| SPV-80A_gp70 | 40387 | 40689 | 216   | 214   | 230   | 3405  | 3802   | 4088   | <b>3765</b>        | 343         | holin                 |
| SPV-80A_gp71 | 40701 | 42155 | 1095  | 1068  | 1043  | 3594  | 3952   | 3860   | <b>3802</b>        | 185.9139586 | lyt2                  |
| SPV-80A_gp72 | 42409 | 42636 | 3138  | 5168  | 5804  | 65734 | 122031 | 137086 | <b>108283.6667</b> | 37610.08982 | hypothetical protein  |
| SPV-80A_gp73 | 42770 | 43606 | 13354 | 12330 | 10659 | 76201 | 79309  | 68579  | <b>74696.33333</b> | 5520.981917 | hypothetical protein  |
